# Supplementary material for: Sol-gel preparation of AlPO4–SiO2 glasses with high surface mesoporous structure
Source: Royal Society of Chemistry journal article supplement (doi:10.1039/b516599g), 2006-01-01
Supplement: b516599g.pdf [file b516599g.pdf]

## Electronic supplementary information

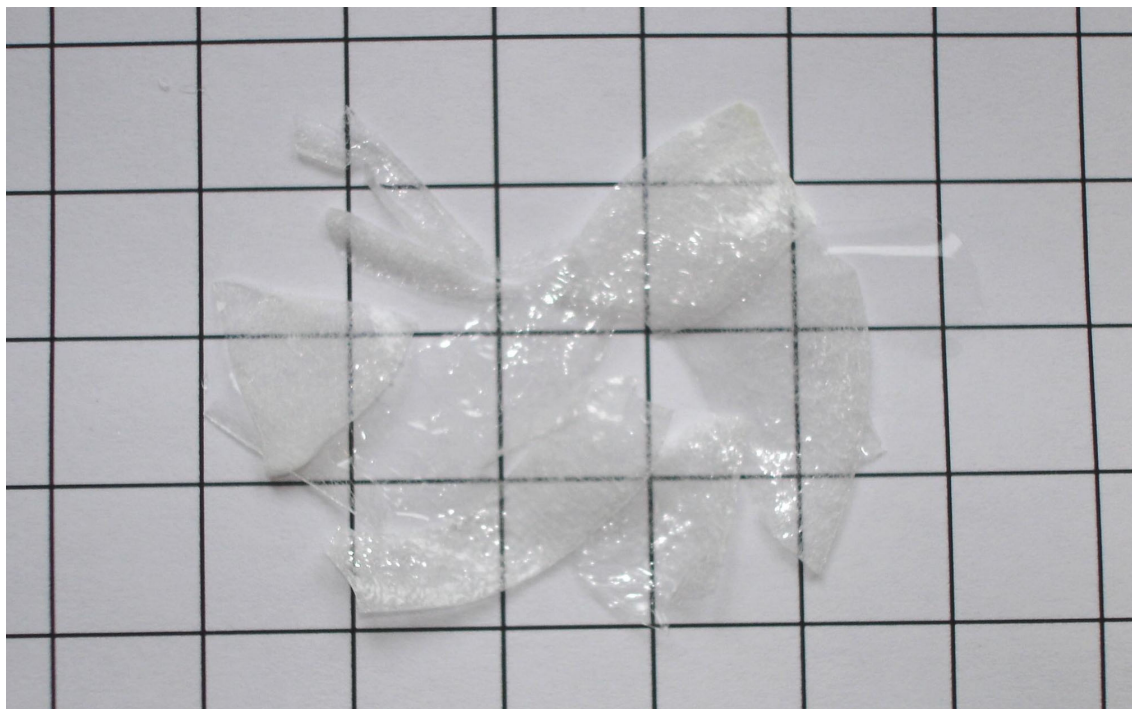

Figure S1: High surface area glassy  $\text{AlPO}_4\text{-SiO}_2$ , calcined at 700 °C for 8 h (1 bar = 1 cm).
